# Supplementary material for: A multiscale 3D chemotaxis assay reveals bacterial navigation mechanisms
Source: PubMed Central journal article supplement (PMC8175578; doi:10.1038/s42003-021-02190-2), 2021-06-03
Supplement: 42003_2021_2190_MOESM2_ESM.pdf [file 42003_2021_2190_MOESM2_ESM.pdf]

## **Description of Additional Supplementary Files**

**File name:** Supplementary Data 1

**Description:** All data shown in the main and Supplementary Figures is provided in Excel format as Supplementary Data 1. Each sheet corresponds to one figure.
